# Supplementary material
Source: MDPI journal article supplement (https://www.mdpi.com/1996-1073/11/9/2198)
Supplement: s1 [file s1]

# Supplementary Materials: Comparing the Biomass Yield and Biogas Potential of *Phragmites australis* with *Miscanthus x giganteus* and *Panicum virgatum* Grown in Canada

Kurtis Baute <sup>1</sup>, Laura L. Van Eerd <sup>1</sup>, Darren E. Robinson <sup>2</sup>, Peter H. Sikkema <sup>2</sup>, Maryam Mushtaq <sup>1</sup> and Brandon H. Gilroyed <sup>1,\*</sup>

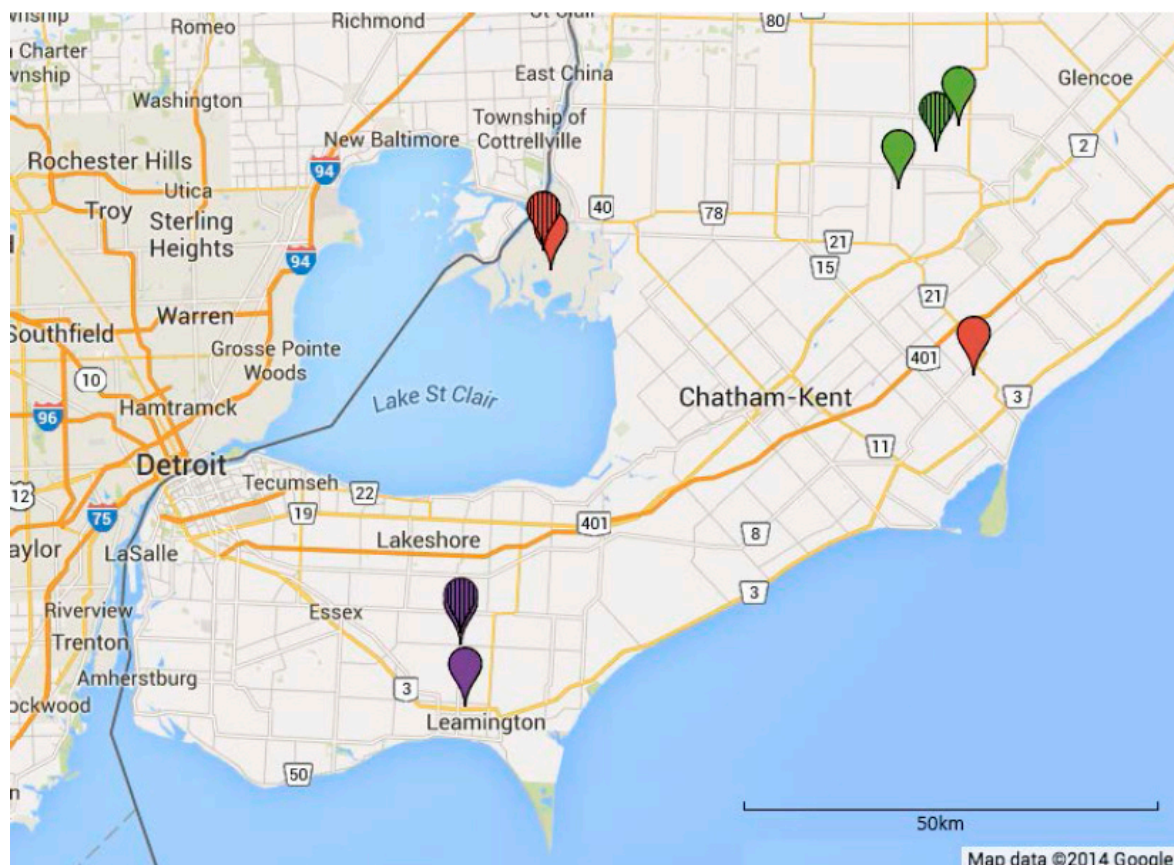

**Figure S1.** Location of cultivated *Miscanthus x giganteus* (purple markers; 42°4.132' N 82°38.1' W, 42°8.196' N 82°38.406' W and 42°8.71' N 82°38.276' W) and *Panicum virgatum* (green markers; 42°41.783' N 81°54.737' W, 42°41.788' N 81°54.731' W and 42°37.629' N 81°59.897' W) biomass, as well as wild stands of *Phragmites australis* (red markers; 42°33.368' N 82°31.178' W, 42°33.617' N 82°31.17' W and 42°19.904' N 82°24.576' W) used in this experiment conducted in southwestern Ontario. Striped markers denote locations of the samples used in the biological methane potential analysis.

**Table S1.** Mean ( $\pm$  standard error) nutrient concentrations in *Phragmites australis*, *Panicum virgatum*, and *Miscanthus x giganteus* ( $n = 3$ ) and *Zea mays* silage ( $n = 1$ ) during July and October harvests for 2013 samples. Means followed by the same letter in each column were not significantly different according to Tukey's range test ( $p > 0.05$ ). *Zea mays* was not analyzed due to lack of replication.

| Species              | Magnesium <sup>††</sup>           | Nitrogen           | Phosphorus <sup>†</sup> | Potassium         | Sodium          | Copper                             | Manganese <sup>†</sup> |
|----------------------|-----------------------------------|--------------------|-------------------------|-------------------|-----------------|------------------------------------|------------------------|
|                      | ----- g kg <sup>-1</sup> DM ----- |                    |                         |                   |                 | ----- mg kg <sup>-1</sup> DM ----- |                        |
| <i>M x giganteus</i> | 2.7ab                             | 12.7 ( $\pm$ 2.4)b | 1.5b                    | 12.5 ( $\pm$ 2.1) | 0.2 ( $\pm$ 0)a | 3.9 ( $\pm$ 1.0)b                  | 43.5ab                 |
| <i>P. australis</i>  | 4.4b                              | 14.2 ( $\pm$ 1.9)b | 0.7a                    | 9.5 ( $\pm$ 2.2)  | 0.4 ( $\pm$ 0)b | 1.2 ( $\pm$ 0.7)a                  | 123.7b                 |
| <i>P. virgatum</i>   | 1.6a                              | 7.0 ( $\pm$ 0.8)a  | 1.5b                    | 10.2 ( $\pm$ 1.6) | 0.1 ( $\pm$ 0)a | 1.8 ( $\pm$ 0.7)a                  | 17.9a                  |

|                               |                     |               |       |                 |            |             |       |
|-------------------------------|---------------------|---------------|-------|-----------------|------------|-------------|-------|
| <i>Z. mays</i>                | 1.7                 | 13.2          | 2.8   | 13.4            | 0.3        | 9.79        | 35.4  |
| <b>Harvest Time</b>           |                     |               |       |                 |            |             |       |
| July                          | 2.8                 | 14.5 (±1.8)m  | 1.6   | 14.7<br>(±0.9)m | 0.2 (±0)   | 4.0 (±0.6)m | 46.7  |
| October                       | 2.7                 | 8.1 (±0.9)n   | 0.9   | 6.7 (±0.7)n     | 0.3 (±0.1) | 0.6 (±0.4)n | 45    |
| <b>Species * Harvest Time</b> |                     |               |       |                 |            |             |       |
| <i>M x giganteus</i> *        | 52.3                | 17.9 (±0.9)x  | 2.2   | 16.4 (±2.2)     | 0.2 (±0.0) | 5.86 (±0.8) | 50.9  |
| July                          |                     |               |       |                 |            |             |       |
| <i>M x giganteus</i> *        | 21.7                | 7.4 (±0.9)z   | 0.9   | 8.6 (±0.9)      | 0.2 (±0.0) | 1.8 (±0.4)  | 19.8  |
| October                       |                     |               |       |                 |            |             |       |
| <i>P. australis</i> * July    | 109.3               | 17.4 (±2.6)xy | 1.1   | 14.0 (±1.4)     | 0.3 (±0.0) | 2.7 (±0.5)  | 99.5  |
| <i>P. australis</i> *         | 157.2               | 11.1 (±1)yz   | 0.6   | 4.9 (±1)        | 0.4 (±0.1) | -0.3 (±0.3) | 153.7 |
| October                       |                     |               |       |                 |            |             |       |
| <i>P. virgatum</i> * July     | 22.1                | 8.3 (±1.2)z   | 1.7   | 13.8 (±0.2)     | 0.2 (±0.0) | 3.3 (±0.6)  | 20.1  |
| <i>P. virgatum</i> *          | 16.5                | 5.8 (±0.2)z   | 1.4   | 6.6 (±0.3)      | 0.1 (±0.0) | 0.3 (±0.2)  | 15.9  |
| October                       |                     |               |       |                 |            |             |       |
| <b>Effect</b>                 | ----- p value ----- |               |       |                 |            |             |       |
| Species                       | 0.002               | <0.001        | 0.004 | 0.072           | <0.001     | <0.001      | 0.002 |
| Harvest Time                  | 0.773               | <0.001        | 0.004 | <0.001          | 0.464      | <0.001      | 0.912 |
| Harvest Time *                | 0.649               | 0.034         | 0.322 | 0.739           | 0.107      | 0.474       | 0.633 |
| Species                       |                     |               |       |                 |            |             |       |

† Square root back-transformed. ‡ Base-10 logarithm back-transformed. \* denotes interaction between variables.

**Table S2.** Mean nutrient concentrations in *Phragmites australis*, *Panicum virgatum*, and *Miscanthus x giganteus* ( $n = 3$ ) and *Zea mays* silage ( $n = 1$ ) during summer and fall harvests for 2013 samples. *Zea mays* was not analyzed due to lack of replication.

|                                | Calcium                    | Iron                            | Zinc        |
|--------------------------------|----------------------------|---------------------------------|-------------|
|                                | --- g kg <sup>-1</sup> --- | ----- mg kg <sup>-1</sup> ----- |             |
| <b>Species</b>                 |                            |                                 |             |
| <i>M x giganteus</i>           | 2.8 (±0.3)                 | 55.5 (±2.6)                     | 21.4 (±4.4) |
| <i>P. australis</i>            | 3.2 (±0.3)                 | 53.5 (±4)                       | 27.8 (±3.8) |
| <i>P. virgatum</i>             | 3.2 (±0.6)                 | 54.9 (±5.9)                     | 14.5 (±1.1) |
| <i>Z. mays</i>                 | 4.6                        | 2205.5                          | 22.1        |
| <b>Harvest Time</b>            |                            |                                 |             |
| July                           | 2.7 (±0.3)                 | 51.4 (±3.1)                     | 23.1 (±3.2) |
| October                        | 3.4 (±0.3)                 | 58.2 (±3.6)                     | 19.4 (±3.3) |
| <b>Species * Harvest Time</b>  |                            |                                 |             |
| <i>M x giganteus</i> * July    | 2.7 (±0.5)                 | 56.9 (±4.7)                     | 25.3 (±5.4) |
| <i>M x giganteus</i> * October | 2.8 (±0.2)                 | 53.4 (±2.0)                     | 17.5 (±7.3) |
| <i>P. australis</i> * July     | 3.1 (±0.6)                 | 48.2 (±6.6)                     | 29.1 (±6)   |
| <i>P. australis</i> * October  | 3.3 (±0.2)                 | 58.8 (±3.2)                     | 26.4 (±6)   |
| <i>P. virgatum</i> * July      | 2.3 (±0.3)                 | 49.0 (±4.9)                     | 15.0 (±2.0) |
| <i>P. virgatum</i> * October   | 4.2 (±0.8)                 | 60.8 (±10.6)                    | 14.1 (±1.4) |
| <b>Effect</b>                  |                            |                                 |             |
| Species                        | 0.571                      | 0.963                           | 0.074       |
| Harvest Time                   | 0.089                      | 0.262                           | 0.390       |
| Harvest Time * Species         | 0.147                      | 0.476                           | 0.787       |

\* denotes interaction between variables.

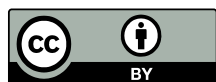

© 2018 by the authors. Submitted for possible open access publication under the terms and conditions of the Creative Commons Attribution (CC BY) license (<http://creativecommons.org/licenses/by/4.0/>).
